# Supplementary material
Source: PubMed Central journal article supplement (PMC6110989)
Supplement: NIHMS965776-supplement-supplement_1.pdf [file NIHMS965776-supplement-supplement_1.pdf]

Supplemental Materials A  
References Used in the Meta-Analytic Structural Equation Modeling Application

- \*Acquavita, T. L. (2013). *A longitudinal exploration of the relationship between oral reading fluency and reading comprehension achievement among a sample of diverse young learners*. Retrieved from PsycINFO. (1492668302; 2013-99230-352).
- \*Adlof, S. M., Catts, H. W., & Lee, J. (2010). Kindergarten predictors of second versus eighth grade reading comprehension impairments. *Journal of Learning Disabilities, 43*(4), 332-345. <https://doi.org/10.1177/0022219410369067>
- \*Ahmed, Y., Francis, D. J., York, M., Fletcher, J. M., Barnes, M., & Kulesz, P. (2016). Validation of the direct and inferential mediation (DIME) model of reading comprehension in grades 7 through 12. *Contemporary Educational Psychology, 44*, 68-82. <https://doi.org/10.1016/j.cedpsych.2016.02.002>
- \*Arrington, C. N., Kulesz, P. A., Francis, D. J., Fletcher, J. M., & Barnes, M. A. (2014). The contribution of attentional control and working memory to reading comprehension and decoding. *Scientific Studies of Reading, 18*(5), 325-346. <https://doi.org/10.1080/10888438.2014.902461>
- \*Babayiğit, S. (2015). The relations between word reading, oral language, and reading comprehension in children who speak English as a first (L1) and second language (L2): A multigroup structural analysis. *Reading and Writing, 28*(4), 527-544. <https://doi.org/10.1007/s11145-014-9536-x>
- \*Behrman, E. H., & Street, C. (2005). The validity of using a content-specific reading comprehension test for college placement. *Journal of College Reading and Learning, 35*(2), 5-21. <https://doi.org/10.1080/10790195.2005.10850170>

- \*Berninger, V. W., & Abbott, R. D. (2010). Listening comprehension, oral expression, reading comprehension, and written expression: Related yet unique language systems in grades 1, 3, 5, and 7. *Journal of Educational Psychology, 102*(3), 635-651.  
<https://doi.org/10.1037/a0019319>
- \*Betjemann, R. S., Keenan, J. M., Olson, R. K., & DeFries, J. C. (2011). Choice of reading comprehension test influences the outcomes of genetic analyses. *Scientific Studies of Reading, 15*(4), 363-382. <https://doi.org/10.1080/10888438.2010.493965>
- \*Betjemann, R. S., Willcutt, E. G., Olson, R. K., Keenan, J. M., DeFries, J. C., & Wadsworth, S. J. (2008). Word reading and reading comprehension: Stability, overlap and independence. *Reading and Writing, 21*(5), 539-558. <https://doi.org/10.1007/s11145-007-9076-8>
- \*Bowles, A. S. (2014). The Relationship between mClass Reading 3D Assessment and the North Carolina End-of-Grade Assessment of Reading Comprehension in an Elementary School
- \*Braze, D., Katz, L., Magnuson, J. S., Mencl, W. E., Tabor, W., Van Dyke, J. A., ... & Shankweiler, D. P. (2016). Vocabulary does not complicate the simple view of reading. *Reading and Writing, 29*, 435-451. <https://doi.org/10.1007/s11145-015-9608-6>
- \*Brimo, D., Apel, K., & Fountain, T. (2015). Examining the contributions of syntactic awareness and syntactic knowledge to reading comprehension. *Journal of Research in Reading*. Early View. <https://doi.org/10.1111/1467-9817.12050>
- \*Cain, K., & Oakhill, J. (2011). Matthew effects in young readers: Reading comprehension and reading experience aid vocabulary development. *Journal of Learning Disabilities, 44*(5), 431-443. <https://doi.org/10.1177/0022219411410042>

- \*Cain, K., & Oakhill, J. (2014). Reading comprehension and vocabulary: Is vocabulary more important for some aspects of comprehension? *L'Annee Psychologique*, *114*, 647-662.
- \*Cain, K., Oakhill, J., & Bryant, P. (2004). Children's reading comprehension ability: Concurrent prediction by working memory, verbal ability, and component skills. *Journal of Educational Psychology*, *96*(1), 31-42. <https://doi.org/10.1037/0022-0663.96.1.31>
- \*Cartwright, K. B. (2007). The contribution of graphophonological-semantic flexibility to reading comprehension in college students: Implications for a less simple view of reading. *Journal of Literacy Research*, *39*(2), 173-193.  
<https://doi.org/10.1080/10862960701331902>
- \*Cartwright, K. B., Marshall, T. R., Dandy, K. L., & Isaac, M. C. (2010). The development of graphophonological-semantic cognitive flexibility and its contribution to reading comprehension in beginning readers. *Journal of Cognition and Development*, *11*(1), 61-85. <https://doi.org/10.1080/15248370903453584>
- \*Cartwright, K. B., Marshall, T. R., & Wray, E. (2016). A longitudinal study of the role of reading motivation in primary students' reading comprehension: implications for a less simple view of reading. *Reading Psychology*, *37*(1), 55-91.  
<https://doi.org/10.1080/02702711.2014.991481>
- \*Catts, H. W., Herrera, S., Nielsen, D. C., & Bridges, M. S. (2015). Early prediction of reading comprehension within the simple view framework. *Reading and Writing*, *28*(9), 1407-1425. <https://doi.org/10.1007/s11145-015-9576-x>
- \*Clinton, V. (2015). Examining associations between reading motivation and inference generation beyond reading comprehension skill. *Reading Psychology*, *36*(6), 473-498.  
<https://doi.org/10.1080/02702711.2014.892040>

- \*Connor, C. M., Spencer, M., Day, S. L., Giuliani, S., Ingebrand, S. W., McLean, L., & Morrison, F. J. (2014). Capturing the complexity: Content, type, and amount of instruction and quality of the classroom learning environment synergistically predict third graders' vocabulary and reading comprehension outcomes. *Journal of Educational Psychology, 106*(3), 762-778. <https://doi.org/10.1037/a0035921>
- \*Corso, H. V., Cromley, J. G., Sperb, T., & Salles, J. F. (2016). Modeling the relationship among reading comprehension, intelligence, socioeconomic status, and neuropsychological functions: The mediating role of executive functions. *Psychology & Neuroscience, 9*(1), 32 -45. <https://doi.org/10.1037/pne0000036>
- \*Courbron, C. (2012). *The correlation between the three reading fluency subskills and reading comprehension in at-risk adolescent readers*. (Doctoral dissertation, Liberty University).
- \*Crosby, R. G. (2013). *Reading Attitudes as a Predictor of Latino Adolescents' Reading Comprehension*. Doctoral dissertation. University of California – Riverside. <http://escholarship.org/uc/item/5m3894wg>
- \*Cromley, J. G. (2005). *Reading comprehension component processes in early adolescence*. Doctoral Dissertation, University of Maryland.
- \*Cromley, J. G., & Azevedo, R. (2007). Testing and refining the direct and inferential mediation model of reading comprehension. *Journal of Educational Psychology, 99*(2), 311-325. <https://doi.org/10.1037/0022-0663.99.2.311>
- \*Cromley, J. G., Snyder-Hogan, L. E., & Luciw-Dubas, U. A. (2010). Reading comprehension of scientific text: A domain-specific test of the direct and inferential mediation model of reading comprehension. *Journal of Educational Psychology, 102*(3), 687. <https://doi.org/10.1037/a0019452>

- \*Cutting, L. E., & Scarborough, H. S. (2006). Prediction of reading comprehension: Relative contributions of word recognition, language proficiency, and other cognitive skills can depend on how comprehension is measured. *Scientific Studies of Reading, 10*(3), 277-299. [https://doi.org/10.1207/s1532799xssr1003\\_5](https://doi.org/10.1207/s1532799xssr1003_5)
- \*Cutting, L. E., Materek, A., Cole, C. A., Levine, T. M., & Mahone, M. E. (2009). Effects of fluency, oral language, and executive function on reading comprehension performance. *Annals of Dyslexia, 59*(1), 34-54. <https://doi.org/10.1007/s11881-009-0022-0>
- \*Daneman, M., & Hannon, B. (2001). Using working memory theory to investigate the construct validity of multiple-choice reading comprehension tests such as the SAT. *Journal of Experimental Psychology: General, 130*(2), 208-223. <https://doi.org/10.1037//0096-3445.130.2.208>
- \*Davis, M. H., & Guthrie, J. T. (2015). Measuring reading comprehension of content area texts using an assessment of knowledge organization. *The Journal of Educational Research, 108*(2), 148-164. <https://doi.org/10.1080/00220671.2013.863749>
- \*Deacon, S. H., Kieffer, M. J., & Laroche, A. (2014). The relation between morphological awareness and reading comprehension: Evidence from mediation and longitudinal models. *Scientific Studies of Reading, 18*(6), 432-451. <https://doi.org/10.1080/10888438.2014.926907>
- \*Dieterich, S. E., Assel, M. A., Swank, P., Smith, K. E., & Landry, S. H. (2006). The impact of early maternal verbal scaffolding and child language abilities on later decoding and reading comprehension skills. *Journal of School Psychology, 43*(6), 481-494. <https://doi.org/10.1016/j.jsp.2005.10.003>

- \*Duncan, L. G., McGeown, S. P., Griffiths, Y. M., Stothard, S. E., & Dobai, A. (2015). Adolescent reading skill and engagement with digital and traditional literacies as predictors of reading comprehension. *British Journal of Psychology*, *107*, 209-238.  
<https://doi.org/10.1111/bjop.12134>
- \*Eason, S. H., Goldberg, L. F., Young, K. M., Geist, M. C., & Cutting, L. E. (2012). Reader–text interactions: How differential text and question types influence cognitive skills needed for reading comprehension. *Journal of Educational Psychology*, *104*(3), 515-528.  
<https://doi.org/10.1037/a0027182>
- \*Elwér, Å., Gustafson, S., Byrne, B., Olson, R. K., Keenan, J. M., & Samuelsson, S. (2015). A retrospective longitudinal study of cognitive and language skills in poor reading comprehension. *Scandinavian Journal of Psychology*, *56*(2), 157-166.  
<https://doi.org/10.1111/sjop.12188>
- \*Farley, M. J., & Elmore, P. B. (1992). The relationship of reading comprehension to critical thinking skills, cognitive ability, and vocabulary for a sample of underachieving college freshmen. *Educational and Psychological Measurement*, *52*(4), 921-931. <https://doi.org/10.1177/0013164492052004014>
- \*Fitzhugh, S. L. (2012). *The coherence formation model of illustrated text comprehension: A path model of attention to multimedia text*. Doctoral Dissertation, Temple University.
- \*Flindt, N. L. (2007). *Exploring the relation between basic reading proficiency and reading comprehension across grades*. Doctoral Dissertation, University of Oregon.
- \*Foorman, B. R., Petscher, Y., & Bishop, M. D. (2012). The incremental variance of morphological knowledge to reading comprehension in grades 3–10 beyond prior reading

- comprehension, spelling, and text reading efficiency. *Learning and Individual Differences*, 22(6), 792-798. <https://doi.org/10.1016/j.lindif.2012.07.009>
- \*Freed, J., Adams, C., & Lockton, E. (2015). Predictors of reading comprehension ability in primary school-aged children who have pragmatic language impairment. *Research in Developmental Disabilities*, 41, 13-21. <https://doi.org/10.1016/j.ridd.2015.03.003>
- \*Friedman, N. P., & Miyake, A. (2004). The reading span test and its predictive power for reading comprehension ability. *Journal of memory and language*, 51(1), 136-158. <https://doi.org/10.1016/j.jml.2004.03.008>
- \*Georgiou, G. K., & Das, J. P. (2014). Reading comprehension in university students: Relevance of PASS theory of intelligence. *Journal of Research in Reading*, 37, S101-S115. <https://doi.org/10.1111/j.1467-9817.2012.01542.x>
- \*Georgiou, G. K., & Das, J. P. (2016). What component of executive functions contributes to normal and impaired reading comprehension in young adults? *Research in Developmental Disabilities*, 49, 118-128. <https://doi.org/10.1016/j.ridd.2015.12.001>
- \*Gilbert, J. K., Goodwin, A. P., Compton, D. L., & Kearns, D. M. (2013). Multisyllabic word reading as a moderator of morphological awareness and reading comprehension. *Journal of Learning Disabilities*, 47, 34-43. <https://doi.org/10.1177/0022219413509966>
- \*Goff, D. A., Pratt, C., & Ong, B. (2005). The relations between children's reading comprehension, working memory, language skills and components of reading decoding in a normal sample. *Reading and Writing*, 18(7-9), 583-616. <https://doi.org/10.1007/s11145-004-7109-0>
- \*Guo, Y., Roehrig, A. D., & Williams, R. S. (2011). The relation of morphological awareness and syntactic awareness to adults' reading comprehension: Is vocabulary knowledge a

mediating variable? *Journal of Literacy Research*, 43(2), 159-183.

<https://doi.org/10.1177/1086296X11403086>

\*Haenggi, D., Kintsch, W., & Gernsbacher, M. A. (1995). Spatial situation models and text comprehension. *Discourse Processes*, 19(2), 173-199.

<https://doi.org/10.1080/01638539509544913>

\*Hagaman, J. A. (2008). *Influences on the generation of instrumental inferences during text comprehension*. ProQuest.

\*Hannon, B. (2012). Understanding the relative contributions of lower-level word processes, higher-level processes, and working memory to reading comprehension performance in proficient adult readers. *Reading Research Quarterly*, 47(2), 125-152.

<https://doi.org/10.1002/RRQ.013>

\*Hannon, B. (2014). Are there gender differences in the cognitive components of adult reading comprehension? *Learning and Individual Differences*, 32, 69-79.

<https://doi.org/10.1016/j.lindif.2014.03.017>

\*Hannon, B., & Daneman, M. (2001). A new tool for measuring and understanding individual differences in the component processes of reading comprehension. *Journal of Educational Psychology*, 93(1), 103-128. <https://doi.org/10.1037/0022-0663.93.1.103>

\*Hannon, B., & Daneman, M. (2009). Age-related changes in reading comprehension: an individual-differences perspective. *Experimental Aging Research*, 35(4), 432-456.

<https://doi.org/10.1080/03610730903175808>

\*Harlaar, N., Cutting, L., Deater-Deckard, K., DeThorne, L. S., Justice, L. M., Schatschneider, C., Thompson, L. A., & Petrill, S. A. (2010). Predicting individual differences in reading



comprehension: A twin study. *Annals of Dyslexia*, 60(2), 265-288.

<https://doi.org/10.1007/s11881-010-0044-7>

\*Harlaar, N., Kovas, Y., Dale, P. S., Petrill, S. A., & Plomin, R. (2012). Mathematics is differentially related to reading comprehension and word decoding: Evidence from a genetically sensitive design. *Journal of educational psychology*, 104(3), 622-635.

<https://doi.org/10.1037/a0027646>

\*Hintze, J. M., Callahan, James E., I,II, Matthews, W. J., Williams, S. A. S., & Tobin, K. G. (2002). Oral reading fluency and prediction of reading comprehension in African

American and Caucasian elementary school children. *School Psychology Review*, 31(4), 540-553.

\*Holmes, V. M. (2009). Bottom-up processing and reading comprehension in experienced adult readers. *Journal of Research in Reading*, 32(3), 309-326. [https://doi.org/10.1111/j.1467-](https://doi.org/10.1111/j.1467-9817.2009.01396.x)

[9817.2009.01396.x](https://doi.org/10.1111/j.1467-9817.2009.01396.x)

\*Holsgrove, J. V., & Garton, A. F. (2006). Phonological and syntactic processing and the role of working memory in reading comprehension among secondary school students. *Australian Journal of Psychology*, 58(2), 111-118. <https://doi.org/10.1080/00049530600730476>

\*Jackson, N. E. (2005). Are university students' component reading skills related to their text comprehension and academic achievement? *Learning and Individual Differences*, 15(2), 113-139. <https://doi.org/10.1016/j.lindif.2004.11.001>

\*Jenkins, J. R., Fuchs, L. S., van den Broek, P., Espin, C., & Deno, S. L. (2003). Sources of individual differences in reading comprehension and reading fluency. *Journal of Educational Psychology*, 95(4), 719-729. <https://doi.org/10.1037/0022-0663.95.4.719>

- \*Katzir, T., Lesaux, N. K., & Kim, Y. S. (2009). The role of reading self-concept and home literacy practices in fourth grade reading comprehension. *Reading and Writing*, 22(3), 261-276. <https://doi.org/10.1007/s11145-007-9112-8>
- \*Kendeou, P., Savage, R., & Broek, P. (2009). Revisiting the simple view of reading. *British Journal of Educational Psychology*, 79(2), 353-370. <https://doi.org/10.1348/978185408X369020>
- \*Kendeou, P., van, d. B., White, M. J., & Lynch, J. S. (2009). Predicting reading comprehension in early elementary school: The independent contributions of oral language and decoding skills. *Journal of Educational Psychology*, 101(4), 765-778. <https://doi.org/10.1037/a0015956>
- \*Kershaw, S., & Schatschneider, C. (2012). A latent variable approach to the simple view of reading. *Reading and Writing*, 25(2), 433-464. <https://doi.org/10.1007/s11145-010-9278-3>
- \*Kieffer, M. J., & DiFelice Box, C. (2013). Derivational morphological awareness, academic vocabulary, and reading comprehension in linguistically diverse sixth graders. *Learning and Individual Differences*, 24, 168-175. <https://doi.org/10.1016/j.lindif.2012.12.017>
- \*Kieffer, M. J., Vukovic, R. K., & Berry, D. (2013). Roles of attention shifting and inhibitory control in fourth-grade reading comprehension. *Reading Research Quarterly*, 48(4), 333-348. <https://doi.org/10.1002/rrq.54>
- \*Kim, Y. S., Petscher, Y., & Foorman, B. (2015). The unique relation of silent reading fluency to end-of-year reading comprehension: understanding individual differences at the student, classroom, school, and district levels. *Reading and Writing*, 28(1), 131-150. <https://doi.org/10.1007/s11145-013-9455-2>

- \*Kim, Y., Petscher, Y., Schatschneider, C., & Foorman, B. (2010). Does growth rate in oral reading fluency matter in predicting reading comprehension achievement? *Journal of Educational Psychology*, *102*(3), 652-667. <https://doi.org/10.1037/a0019643>
- \*Kim, Y., Wagner, R. K., & Foster, E. (2011). Relations among oral reading fluency, silent reading fluency, and reading comprehension: A latent variable study of first-grade readers. *Scientific Studies of Reading*, *15*(4), 338-362.  
<https://doi.org/10.1080/10888438.2010.493964>
- \*Kim, Y., Wagner, R. K., & Lopez, D. (2012). Developmental relations between reading fluency and reading comprehension: A longitudinal study from grade 1 to grade 2. *Journal of Experimental Child Psychology*, *113*(1), 93-111.  
<https://doi.org/10.1016/j.jecp.2012.03.002>
- \*Klauda, S. L., & Guthrie, J. T. (2008). Relationships of three components of reading fluency to reading comprehension. *Journal of Educational psychology*, *100*(2), 310-321.  
<https://doi.org/10.1037/0022-0663.100.2.310>
- \*Kugler, J. F. (1993). *The contribution of phonological skills to spelling, word recognition, and reading comprehension in learning-disabled and achieving readers*. Doctoral Dissertation, Fordham University. <http://fordham.bepress.com/dissertations/AAI9809007/>
- \*Kulesz, P. A., Francis, D. J., Barnes, M. A., & Fletcher, J. M. (2017). The influence of properties of the test and their interactions with reader characteristics on reading comprehension: An explanatory item response study. *Journal of Educational Psychology*, *108*, 1078-1097. <https://doi.org/10.1037/edu0000126>
- \*Kwiatkowska-White, B. (2015). *Understanding reading comprehension performance in high school students*. Retrieved from PsycINFO. (1647029978; 2015-99011-093).

- \*Lai, S. A., Benjamin, R. G., Schwanenflugel, P. J., & Kuhn, M. R. (2014). The longitudinal relationship between reading fluency and reading comprehension skills in second-grade children. *Reading & Writing Quarterly: Overcoming Learning Difficulties*, 30(2), 116-138. <https://doi.org/10.1080/10573569.2013.789785>
- \*Landi, N. (2010). An examination of the relationship between reading comprehension, higher-level and lower-level reading sub-skills in adults. *Reading and Writing*, 23(6), 701-717. <https://doi.org/10.1007/s11145-009-9180-z>
- \*Lee, S. E. (2014). *The impact of working memory training on third-grade students' reading fluency and reading comprehension performance*. Retrieved from ProQuest Dissertations & Theses (1660540556).
- \*Liebfreund, M. D. (2015). Success with informational text comprehension: An examination of underlying factors. *Reading Research Quarterly*, 50(4), 387-392. <https://doi.org/10.1002/rrq.109>
- \*Liebfreund, M. D., & Conradi, K. Component skills affecting elementary students' informational text comprehension. *Reading and Writing*, Early View. <https://doi.org/10.1007/s11145-016-9629-9>
- \*Logan, S., Medford, E., & Hughes, N. (2011). The importance of intrinsic motivation for high and low ability readers' reading comprehension performance. *Learning and Individual Differences*, 21(1), 124-128. <https://doi.org/10.1016/j.lindif.2010.09.011>
- \*Marcotte, A. M., & Hintze, J. M. (2009). Incremental and predictive utility of formative assessment methods of reading comprehension. *Journal of School Psychology*, 47(5), 315-335. <https://doi.org/10.1016/j.jsp.2009.04.003>

- \*Mayring, J. A. (2002). *Contributions of phonological and orthographic processing to reading comprehension in second through fourth graders*. Retrieved from ProQuest Dissertations & Theses (AAT 275750210).
- \*McBride-Chang, C., Manis, F. R., Seidenberg, M. S., Custodio, R. G., & Doi, L. M. (1993). Print exposure as a predictor of word reading and reading comprehension in disabled and nondisabled readers. *Journal of Educational Psychology*, 85(2), 230-238.  
<https://doi.org/10.1037/0022-0663.85.2.230>
- \*McClintock, B., Pesco, D., & Martin-Chang, S. (2014). Thinking aloud: Effects on text comprehension by children with Specific Language Impairment and their peers. *International Journal of Language & Communication Disorders*, 49(6), 637-648.  
<https://doi.org/10.1111/1460-6984.12081>
- \*McCown, M. A. (2013). *The effects of collaborative strategic reading on informational text comprehension and metacognitive awareness of fifth grade students*. Doctoral dissertation, Liberty University. <http://digitalcommons.liberty.edu/doctoral/724/>
- \*Mellard, D. F., Fall, E., & Woods, K. L. (2010). A path analysis of reading comprehension for adults with low literacy. *Journal of Learning Disabilities*, 43(2), 154-165.  
<https://doi.org/10.1177/0022219409359345>
- \*Miller, A. C., Fuchs, D., Fuchs, L. S., Compton, D., Kearns, D., Zhang, W., ..., & Kirchner, D. P. (2014). Behavioral attention: A longitudinal study of whether and how it influences the development of word reading and reading comprehension among at-risk readers. *Journal of Research on Educational Effectiveness*, 7(3), 232-249.  
<https://doi.org/10.1080/19345747.2014.906691>

- \*Munger, K. A., & Blachman, B. A. (2013). Taking a "simple view" of the dynamic indicators of basic early literacy skills as a predictor of multiple measures of third-grade reading comprehension. *Psychology in the Schools, 50*(7), 722-737.  
<https://doi.org/10.1002/pits.21699>
- \*Nation, K., & Snowling, M. J. (1998). Individual differences in contextual facilitation: Evidence from dyslexia and poor reading comprehension. *Child Development, 69*(4), 996-1011. <https://doi.org/10.2307/1132359>
- \*Nellenbach, K. M. (2011). *Contributions of oral language, problem-solving, and reading attitudes to young adolescents' silent reading comprehension*. Retrieved from PsycINFO. (897335150; 2011-99130-467).
- \*Oakhill, J., Yuill, N., & Garnham, A. (2011). The differential relations between verbal, numerical and spatial working memory abilities and children's reading comprehension. *International Electronic Journal of Elementary Education, 4*(1), 83.
- \*Ouellette, G. P. (2006). What's meaning got to do with it: The role of vocabulary in word reading and reading comprehension. *Journal of Educational Psychology, 98*(3), 554.  
<https://doi.org/10.1037/0022-0663.98.3.554>
- \*Ouellette, G., & Beers, A. (2010). A not-so-simple view of reading: How oral vocabulary and visual-word recognition complicate the story. *Reading and Writing, 23*, 189–208.  
<https://doi.org/10.1007/s11145-008-9159-1>
- \*Paige, D. D., Rasinski, T., Magpuri-Lavell, T., & Smith, G. S. (2014). Interpreting the relationships among prosody, automaticity, accuracy, and silent reading comprehension in secondary students. *Journal of Literacy Research, 46*(2), 123-156.  
<https://doi.org/10.1177/1086296X14535170>

- \*Paleologos, T. M., & Brabham, E. G. (2011). The effectiveness of DIBELS oral reading fluency for predicting reading comprehension of high- and low-income students. *Reading Psychology, 32*(1), 54-74. <https://doi.org/10.1080/02702710903341262>
- \*Palmer, M. L. (2010). *The relationship between reading fluency, writing fluency, and reading comprehension in suburban third-grade students*(Doctoral dissertation, San Diego State University: University of San Diego).
- \*Pearce, L., & Gayle, R. (2008). Oral reading fluency as a predictor of reading comprehension on a state's measure of adequate yearly progress. *International Journal of Psychology: A Biopsychosocial Approach, 1*, 51-70. <https://www.ceeol.com/search/article-detail?id=62165>
- \*Price, K. W., Meisinger, E. B., Louwse, M. M., & D'Mello, S. (2016). The contributions of oral and silent reading fluency to reading comprehension. *Reading Psychology, 37*(2), 167-201. <https://doi.org/10.1080/02702711.2015.1025118>
- \*Quinn, J. M., Wagner, R. K., Petscher, Y., & Lopez, D. (2015). Developmental relations between vocabulary knowledge and reading comprehension: A latent change score modeling study. *Child Development, 86*, 159-175. <https://doi.org/10.1111/cdev.12292>
- \*Radvansky, G. A., & Copeland, D. E. (2004). Reasoning, integration, inference alteration, and text comprehension. *Canadian Journal of Experimental Psychology, 58*(2), 133-141. <https://doi.org/10.1037/h0085793>
- \*Ransby, M. J., & Swanson, H. L. (2003). Reading comprehension skills of young adults with childhood diagnoses of dyslexia. *Journal of Learning Disabilities, 36*(6), 538-555. <https://doi.org/10.1177/00222194030360060501>

- \*Ready, R. E., Chaudhry, M. F., Schatz, K. C., & Strazzullo, S. (2013). "Passageless" administration of the Nelson–Denny reading comprehension test associations with IQ and reading skills. *Journal of Learning Disabilities*, 46(4), 377-384.  
<https://doi.org/10.1177/0022219412468160>
- \*Reed, D. K., Vaughn, S., & Petscher, Y. (2012). The validity of a holistically scored retell protocol for determining the reading comprehension of middle school students. *Learning Disability Quarterly*, 35(2), 76-89. <https://doi.org/10.1177/0731948711432509>
- \*Reynolds, M. R., & Turek, J. J. (2012). A dynamic developmental link between verbal comprehension-knowledge (gc) and reading comprehension: Verbal comprehension-knowledge drives positive change in reading comprehension. *Journal of School Psychology*, 50(6), 841-863. <https://doi.org/10.1016/j.jsp.2012.07.002>
- \*Riedel, B. W. (2007). The relation between DIBELS, reading comprehension, and vocabulary in urban first-grade students. *Reading Research Quarterly*, 42(4), 546-567. <https://doi.org/10.1598/RRQ.42.4.5>
- \*Roberts, K. L., Norman, R. R., & Cocco, J. (2015). Relationship between graphical device comprehension and overall text comprehension for third-grade children. *Reading Psychology*, 36(5), 389-420. <https://doi.org/10.1080/02702711.2013.865693>
- \*Roehrig, A. D., Petscher, Y., Nettles, S. M., Hudson, R. F., & Torgesen, J. K. (2008). Accuracy of the DIBELS oral reading fluency measure for predicting third grade reading comprehension outcomes. *Journal of School Psychology*, 46(3), 343-366.  
<https://doi.org/10.1016/j.jsp.2007.06.006>



- \*Sanchez, C. A., & Wiley, J. (2014). The role of dynamic spatial ability in geoscience text comprehension. *Learning and Instruction, 31*, 33-45.  
<https://doi.org/10.1016/j.learninstruc.2013.12.007>
- \*Santoro, J. K. (2013). *Clarifying linguistic comprehension in the simple view of reading: The influence of word-, sentence-, and discourse-level linguistic skills on reading comprehension*. Retrieved from PsycINFO. (1420149397; 2013-99111-274).
- \*Savage, R. (2006). Reading comprehension is not always the product of nonsense word decoding and linguistic comprehension: Evidence from teenagers who are extremely poor readers. *Scientific Studies of Reading, 10*(2), 143-164.  
[https://doi.org/10.1207/s1532799xssr1002\\_2](https://doi.org/10.1207/s1532799xssr1002_2)
- \*Savage, R., & Wolforth, J. (2007). An additive simple view of reading describes the performance of good and poor readers in higher education. *Exceptionality Education International, 17*(2), 243-268. Retrieved from <http://ir.lib.uwo.ca/eei/vol17/iss2/6>
- \*Schenker, V. J., & Petrill, S. A. (2015). Overlapping genetic and child-specific nonshared environmental influences on listening comprehension, reading motivation, and reading comprehension. *Journal of Communication Disorders, 57*, 94-105.  
<https://doi.org/10.1016/j.jcomdis.2015.07.006>
- \*Schroeder, P. J. (2014). The effects of age on processing and storage in working memory span tasks and reading comprehension. *Experimental aging research, 40*(3), 308-331.  
<https://doi.org/10.1080/0361073X.2014.896666>
- \*Schuster, J. (2013). *Measuring the reading ability of incoming freshmen: A path analysis investigation into reading comprehension*. Retrieved from PsycINFO. (1353284037; 2013-99060-040).

- \*Shapiro, E. S., Fritschmann, N. S., Thomas, L. B., Hughes, C. L., & McDougal, J. (2014). Concurrent and predictive validity of reading retell as a brief measure of reading comprehension for narrative text. *Reading Psychology, 35*(7), 644-665.  
<https://doi.org/10.1080/02702711.2013.790328>
- \*Silva, M., & Cain, K. (2015). The relations between lower and higher level comprehension skills and their role in prediction of early reading comprehension. *Journal of Educational Psychology, 107*(2), 321. <https://doi.org/10.1037/a0037769>
- \*Silverman, R. D., Speece, D. L., Harring, J. R., & Ritchey, K. D. (2013). Fluency has a role in the simple view of reading. *Scientific Studies of Reading, 17*(2), 108-133.  
<https://doi.org/10.1080/10888438.2011.618153>
- \*Simmons, D., Hairrell, A., Edmonds, M., Vaughn, S., Larsen, R., Willson, V., Rupley, W., & Byrns, G. (2010). A comparison of multiple-strategy methods: Effects on fourth-grade students' general and content-specific reading comprehension and vocabulary development. *Journal of Research on Educational Effectiveness, 3*(2), 121-156.  
<https://doi.org/10.1080/19345741003596890>
- \*Sipe, M. (2005). *Black-White Differences in Reading Comprehension: The Measure Matters*. Doctoral Dissertation, The University of Maryland.  
<http://drum.lib.umd.edu/handle/1903/3179>
- \*Smith, L. R. (2009). *Seventh-grade students reading aloud: An examination of the relationship between rate and accuracy in oral reading and reading comprehension*. Retrieved from PsycINFO. (622046559; 2009-99030-395).

- \*Smith, S. R. (2013). *Testing a multicomponent model of reading comprehension for seventh- and eighth-grade students*. Doctoral dissertation, Texas A&M University.  
<http://oaktrust.library.tamu.edu/handle/1969.1/149630>
- \*Spear-Swerling, L. (2004). Fourth graders' performance on a state-mandated assessment involving two different measures of reading comprehension. *Reading Psychology*, 25(2), 121-148. <https://doi.org/10.1080/02702710490435727>
- \*Spear-Swerling, L., Brucker, P. O., & Alfano, M. P. (2010). Relationships between sixth-graders' reading comprehension and two different measures of print exposure. *Reading and Writing*, 23(1), 73-96. <https://doi.org/10.1007/s11145-008-9152-8>
- \*Splinter, A. F. (2011). *Reading comprehension assessments: Effect of epistemic beliefs on text availability and question type*. Doctoral dissertation, The University of Utah.
- \*Stothers, M., & Klein, P. D. (2010). Perceptual organization, phonological awareness, and reading comprehension in adults with and without learning disabilities. *Annals of Dyslexia*, 60(2), 209-237. <https://doi.org/10.1007/s11881-010-0042-9>
- \*Swanson, H. L., & Alexander, J. E. (1997). Cognitive processes as predictors of word recognition and reading comprehension in learning-disabled and skilled readers: Revisiting the specificity hypothesis. *Journal of Educational Psychology*, 89(1), 128-158.  
<https://doi.org/10.1037/0022-0663.89.1.128>
- \*Swanson, H. L., & Ashbaker, M. H. (2000). Working memory, short-term memory, speech rate, word recognition and reading comprehension in learning disabled readers: Does the executive system have a role? *Intelligence*, 28(1), 1-30. [https://doi.org/10.1016/S0160-2896\(99\)00025-2](https://doi.org/10.1016/S0160-2896(99)00025-2)

- \*Taboada, A. M. (2003). *The association of student questioning with reading comprehension*.  
Doctoral Dissertation. University of Maryland.
- \*Taboada, A., Tonks, S. M., Wigfield, A., & Guthrie, J. T. (2009). Effects of motivational and cognitive variables on reading comprehension. *Reading and Writing*, 22(1), 85-106.  
<https://doi.org/10.1007/s11145-008-9133-y>
- \*Tannenbaum, K. R. (2016). *Relationships Between Measures of Word Knowledge and Reading Comprehension in Third-Grade Children*. Doctoral Dissertation. Florida State University.
- \*Tannenbaum, K. R., Torgesen, J. K., & Wagner, R. K. (2006). Relationships between word knowledge and reading comprehension in third-grade children. *Scientific Studies of Reading*, 10(4), 381-398. [https://doi.org/10.1207/s1532799xssr1004\\_3](https://doi.org/10.1207/s1532799xssr1004_3)
- \*Taylor, H. B., Anthony, J. L., Aghara, R., Smith, K. E., & Landry, S. H. (2008). The interaction of early maternal responsiveness and children's cognitive abilities on later decoding and reading comprehension skills. *Early Education and Development*, 19(1), 188-207.  
<https://doi.org/10.1080/10409280701839304>
- \*Thomas, L. B. (2013). *Evaluating a brief measure of reading comprehension for narrative and expository text: The convergent and predictive validity of the reading retell rubric*.  
Retrieved from PsycINFO. (1366316151; 2013-99071-169).
- \*Tighe, E. L., Wagner, R. K., & Schatschneider, C. (2015). Applying a multiple group causal indicator modeling framework to the reading comprehension skills of third, seventh, and tenth grade students. *Reading and Writing*, 28, 439-466. <https://doi.org/10.1007/s11145-014-9532-1>

- \*Tilstra, J., McMaster, K., Van den Broek, P., Kendeou, P., & Rapp, D. (2009). Simple but complex: Components of the simple view of reading across grade levels. *Journal of research in reading*, 32(4), 383-401. <https://doi.org/10.1111/j.1467-9817.2009.01401.x>
- \*Uccelli, P., Galloway, E. P., Barr, C. D., Meneses, A., & Dobbs, C. L. (2015). Beyond vocabulary: Exploring cross-disciplinary academic-language proficiency and its association with reading comprehension. *Reading Research Quarterly*, 50(3), 337-356. <https://doi.org/10.1002/rrq.104>
- \*Underwood, G., Hubbard, A., & Wilkinson, H. P. (1990). Eye fixations predict reading comprehension: The relationships between reading skill, reading speed, and visual inspection. *Language and Speech*, 33(1), 69-81. <https://doi.org/10.1177/002383099003300105>
- \*Unsworth, N., & McMillan, B. D. (2013). Mind wandering and reading comprehension: Examining the roles of working memory capacity, interest, motivation, and topic experience. *Journal of Experimental Psychology: Learning, Memory, and Cognition*, 39(3), 832. <https://doi.org/10.1037/a0029669>
- \*Van Dyke, J. A., Johns, C. L., & Kukona, A. (2014). Low working memory capacity is only spuriously related to poor reading comprehension. *Cognition*, 131(3), 373-403. <https://doi.org/10.1016/j.cognition.2014.01.007>
- \*Was, C. A., & Woltz, D. J. (2007). Reexamining the relationship between working memory and comprehension: The role of available long-term memory. *Journal of Memory and Language*, 56(1), 86-102. <https://doi.org/10.1016/j.jml.2006.07.008>

- \*Waters, G. S. (1996). The measurement of verbal working memory capacity and its relation to reading comprehension. *The Quarterly Journal of Experimental Psychology: Section A*, 49(1), 51-79. <https://doi.org/10.1080/713755607>
- \*Weems, G. H., Onwuegbuzie, A. J., & Collins, K. M. (2006). The role of reading comprehension in responses to positively and negatively worded items on rating scales. *Evaluation & Research in Education*, 19(1), 3-20. <https://doi.org/10.1080/09500790608668322>
- \*Wheldall, K., & McMurtry, S. (2014). Preliminary evidence for the validity of the new Test of Everyday Reading Comprehension. *Australian Journal of Learning Difficulties*, 19(2), 173-178. <https://doi.org/10.1080/19404158.2014.979525>
- \*Wigfield, A., Guthrie, J. T., Perencevich, K. C., Taboada, A., Klauda, S. L., McRae, A., & Barbosa, P. (2008). Role of reading engagement in mediating effects of reading comprehension instruction on reading outcomes. *Psychology in the Schools*, 45(5), 432-445. <https://doi.org/10.1002/pits.20307>
- \*Wise, J. C., Sevcik, R. A., Morris, R. D., Lovett, M. W., & Wolf, M. (2007). The relationship among receptive and expressive vocabulary, listening comprehension, pre-reading skills, word identification skills, and reading comprehension by children with reading disabilities. *Journal of Speech, Language, and Hearing Research*, 50(4), 1093-109. [https://doi.org/10.1044/1092-4388\(2007/076\)](https://doi.org/10.1044/1092-4388(2007/076))
- \*Yoon, H. J. (2012). *The association between reading comprehension and prerequisite skills for children in poverty*. Retrieved from PsycINFO. (1171944950; 2012-99180-398).
- \*Yovanoff, P., Duesbery, L., Alonzo, J., & Tindal, G. (2005). Grade-level invariance of a theoretical causal structure predicting reading comprehension with vocabulary and oral

reading fluency. *Educational Measurement: Issues and Practice*, 24(3), 4-12.

<https://doi.org/10.1111/j.1745-3992.2005.00014.x>

\*Zinar, S. (2000). The relative contributions of word identification skill and comprehension-monitoring behavior to reading comprehension ability. *Contemporary Educational*

*Psychology*, 25(4), 363-377. <https://doi.org/10.1006/ceps.2000.1024>

\*Zipke, M. (2007). The role of metalinguistic awareness in the reading comprehension of sixth and seventh graders. *Reading Psychology*, 28(4), 375-396.

<https://doi.org/10.1080/02702710701260615>

## Supplemental Materials B

### Results of Model Robustness Checks

Because we had a large number of studies with many participants, we did a check of robustness on our modeling by randomly selecting approximately half of the matrices (107) from the total number of matrices (220). The purpose of this was to test our modeling a subset of the studies as an internal check of validity; however, we experienced a few problems. The first of which was appropriate splitting to ensure enough studies were present in each cell of the matrix. It has been recommended that each cell in the correlation matrix have at least **four** estimates from separate matrices for proper point estimation and confidence interval calculations (Cheung, 2015b). Table B1 includes coverage numbers –values that indicate the number of correlations available in each cell of the composite correlation matrix. As can be seen, there were relatively few studies across the subsample that measured background knowledge, and there were not enough to properly estimate the full composite correlation matrix. Table B2 contains the coverage for all  $k = 155$  studies (220 matrices).

In order to test the robustness of the remaining variables, we ran the models on the two subsets without background knowledge. The results of this model are presented in Table B3 and in Figures B1. Cells with homogeneity estimates ( $I^2$ ) below 0.1 are highlighted in green.



*Table B1.*

Coverage matrix for Group 1 ( $n = 107$  matrices).

|     | RC  | WRF | TRF | DEC | VOC | LC | RI | WM | BGK |
|-----|-----|-----|-----|-----|-----|----|----|----|-----|
| RC  | 102 | 31  | 44  | 34  | 65  | 25 | 32 | 30 | 24  |
| WRF | 31  | 31  | 13  | 9   | 21  | 12 | 16 | 9  | 11  |
| TRF | 44  | 13  | 44  | 13  | 27  | 14 | 5  | 9  | 2   |
| DEC | 34  | 9   | 13  | 36  | 25  | 19 | 10 | 13 | 6   |
| VOC | 65  | 21  | 27  | 25  | 67  | 22 | 23 | 19 | 17  |
| LC  | 25  | 12  | 14  | 19  | 22  | 27 | 8  | 12 | 2   |
| RI  | 32  | 16  | 5   | 10  | 23  | 8  | 32 | 19 | 13  |
| WM  | 30  | 9   | 9   | 13  | 19  | 12 | 19 | 30 | 8   |
| BGK | 24  | 11  | 2   | 6   | 17  | 2  | 13 | 8  | 24  |

For reporting purposes, Table B2 includes the correlation coverage for all 155 studies across 220 matrices.

*Table B2.*

Coverage matrix for all matrices ( $n = 220$ ).

|     | RC  | WRF | TRF | DEC | VOC | LC | RI | WM | BGK |
|-----|-----|-----|-----|-----|-----|----|----|----|-----|
| RC  | 213 | 57  | 88  | 76  | 134 | 54 | 65 | 56 | 44  |
| WRF | 57  | 59  | 20  | 19  | 39  | 24 | 29 | 19 | 16  |
| TRF | 88  | 20  | 90  | 23  | 54  | 20 | 10 | 16 | 4   |
| DEC | 76  | 19  | 23  | 81  | 52  | 32 | 25 | 22 | 15  |
| VOC | 134 | 39  | 54  | 52  | 140 | 46 | 47 | 34 | 32  |
| LC  | 54  | 24  | 20  | 32  | 46  | 59 | 19 | 21 | 4   |
| RI  | 65  | 29  | 10  | 25  | 47  | 19 | 68 | 36 | 26  |
| WM  | 56  | 19  | 16  | 22  | 34  | 21 | 36 | 60 | 15  |
| BGK | 44  | 16  | 4   | 15  | 32  | 4  | 26 | 15 | 47  |

*Table B3.*Composite correlation matrix for random subset of matrices ( $n = 107$ )

|     | RC    | WRF   | TRF   | DEC   | VOC   | LC    | RI    | WM |
|-----|-------|-------|-------|-------|-------|-------|-------|----|
| RC  | --    |       |       |       |       |       |       |    |
| WRF | 0.475 | --    |       |       |       |       |       |    |
| TRF | 0.583 | 0.717 | --    |       |       |       |       |    |
| DEC | 0.565 | 0.559 | 0.611 | --    |       |       |       |    |
| VOC | 0.56  | 0.433 | 0.503 | 0.488 | --    |       |       |    |
| LC  | 0.519 | 0.313 | 0.396 | 0.368 | 0.481 | --    |       |    |
| RI  | 0.432 | 0.258 | 0.359 | 0.366 | 0.382 | 0.371 | --    |    |
| WM  | 0.346 | 0.362 | 0.393 | 0.359 | 0.344 | 0.331 | 0.346 | -- |

*Note.* Correlations are below the diagonal; heterogeneity estimates are above the diagonal. Highlighted cells indicate homogenous correlations ( $I^2 < 0.1$ )

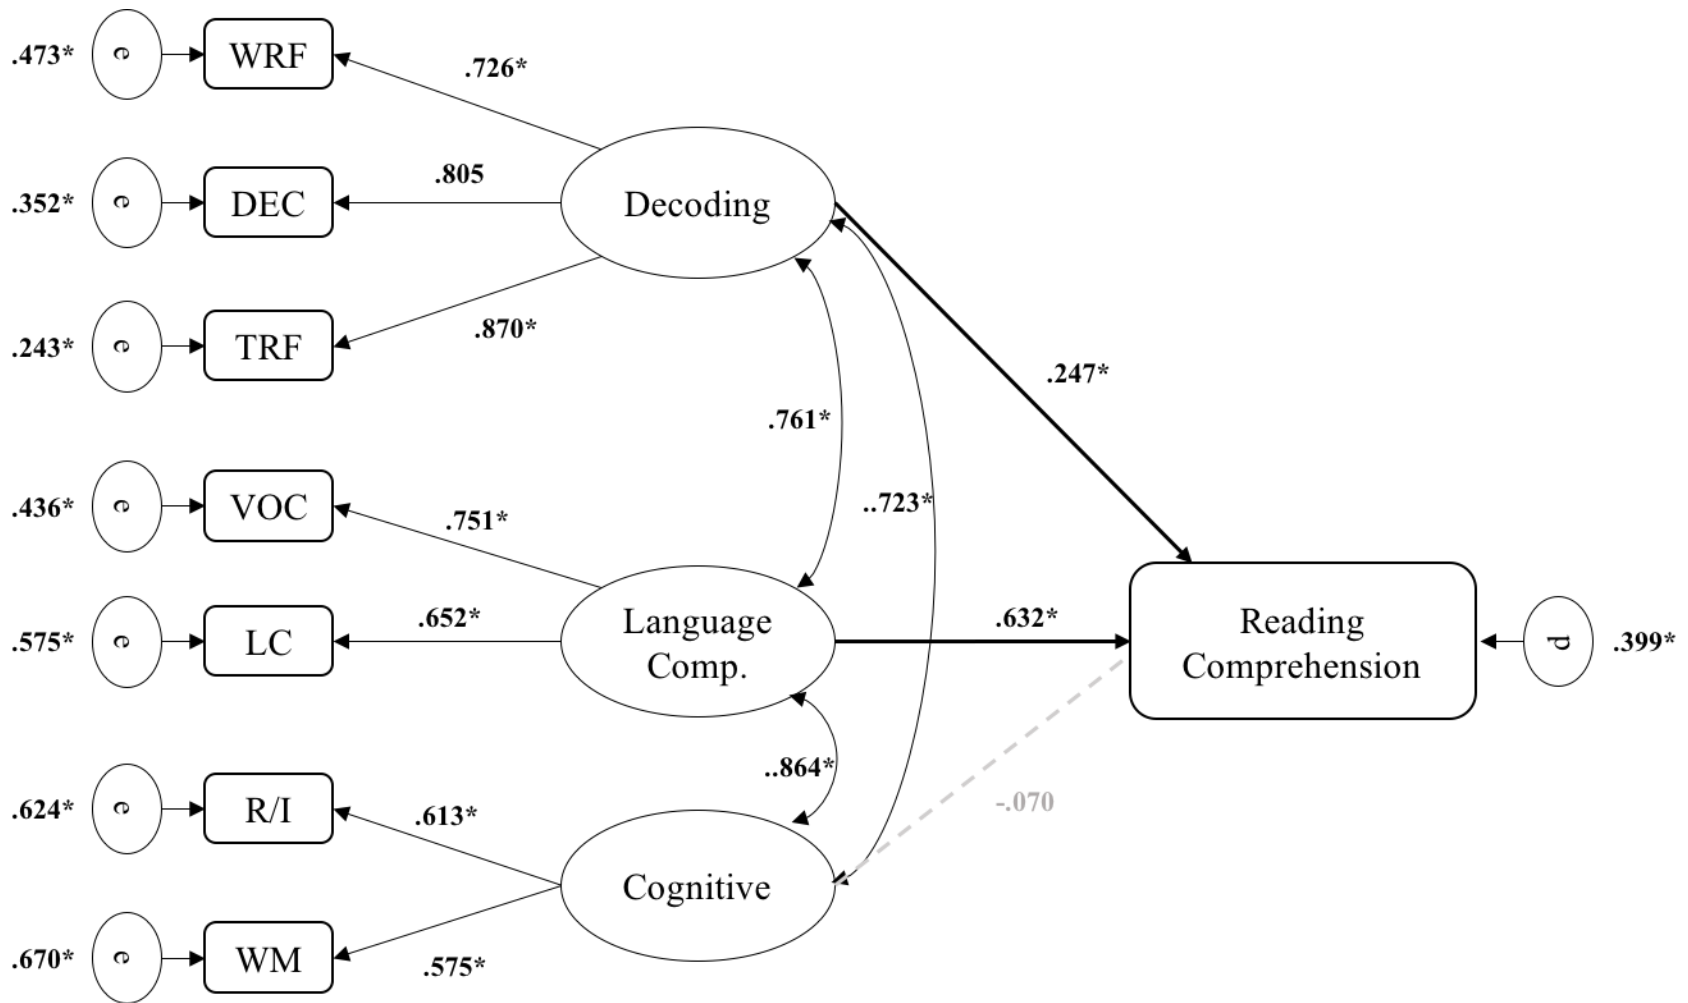

Figure B1. Model results for the random subset ( $n = 107$  matrices) without background knowledge. Model fit:  $\chi^2 [15] = 45.9037, p < .001, CFI = 0.9948, RMSEA = 0.0020 [0.0014 - 0.0027], SRMR = 0.0363$ .

Supplemental Materials C  
Results of the CFA model testing

We tested the factor structure of the components using two CFA models. A two factor model specified that the hypothesized predictors were part of two general factors as specified in the *Simple View of Reading*: Word Decoding and Linguistic Comprehension. The three-factor model introduced a third factor that represented a cognitive factor with reasoning/inference and working memory separate from the linguistic comprehension factor. The three-factor model was the best fitting model for the total sample (See Table C1): working memory and reasoning and inference are part of a component separate from linguistic comprehension (See Figure C1 below).

Table C1

Model fit statistics for the confirmatory factor analyses with the overall sample

|                     | $\chi^2$       | df        | <i>p</i>      | CFI           | RMSEA         | 95% CI                   | SRMR          |
|---------------------|----------------|-----------|---------------|---------------|---------------|--------------------------|---------------|
| Two Factor          | 47.7683        | 19        | 0.0003        | 0.9916        | 0.0011        | (0.0007 - 0.0015)        | 0.0364        |
| <b>Three Factor</b> | <b>39.3252</b> | <b>17</b> | <b>0.0016</b> | <b>0.9927</b> | <b>0.0010</b> | <b>(0.0006 - 0.0015)</b> | <b>0.0344</b> |

*Note.*  $\chi^2$  = chi-square test of model fit; df = degrees of freedom for chi-square test. CFI = Confirmatory Fit Index; RMSEA = root mean squared error of approximation; CI = confidence interval; SRMR = standardized root mean square residual. Bolded row = chosen model.

We next fit the two and three factor solutions to the younger and older samples separately. The two factor model was the best fit for the younger sample, as the added complexity and loss of model parsimony with adding the third factor did not result in a better fitting model. The three factor model was the best fit for the older sample (See Table C2).

Cognitive components dissociate from linguistic comprehension for older children and adolescents.

Table C2

Model fit statistics for the confirmatory factor analyses separated by age group

|                       | $\chi^2$       | df        | <i>p</i>      | CFI           | RMSEA         | 95% CI                   | SRMR          |
|-----------------------|----------------|-----------|---------------|---------------|---------------|--------------------------|---------------|
| <i>Younger Sample</i> |                |           |               |               |               |                          |               |
| <b>Two Factor</b>     | <b>31.0531</b> | <b>18</b> | <b>0.0285</b> | <b>0.9985</b> | <b>0.0012</b> | <b>(0.0004 - 0.0018)</b> | <b>0.0347</b> |
| Three Factor          | 29.7194        | 15        | 0.0130        | 0.9983        | 0.0014        | (0.0006 - 0.0021)        | 0.0339        |
| <i>Older Sample</i>   |                |           |               |               |               |                          |               |
| Two Factor            | 65.9586        | 25        | < 0.001       | 0.9937        | 0.0016        | (0.0011 - 0.0020)        | 0.0483        |
| <b>Three Factor</b>   | <b>53.8364</b> | <b>22</b> | <b>0.0002</b> | <b>0.9951</b> | <b>0.0015</b> | <b>(0.0010 - 0.0020)</b> | <b>0.0451</b> |

Note.  $\chi^2$  = chi-square test of model fit; df = degrees of freedom for chi-square test. CFI = Confirmatory Fit Index; RMSEA = root mean squared error of approximation; CI = confidence interval; SRMR = standardized root mean square residual. Bolded row = chosen model.

Table C3

Correlations and heterogeneity statistics for the older cohort.

| Construct | 1    | 2           | 3    | 4    | 5    | 6           | 7    | 8           |
|-----------|------|-------------|------|------|------|-------------|------|-------------|
| 1. RC     | --   | .979        | .958 | .986 | .979 | .973        | .941 | .911        |
| 2. WRF    | .569 | --          | .984 | .988 | .984 | <b>.000</b> | .946 | <b>.000</b> |
| 3. TRF    | .621 | .740        | --   | .982 | .991 | .939        | .984 | <b>.000</b> |
| 4. DA     | .610 | .593        | .642 | --   | .968 | .972        | .986 | .881        |
| 5. V/M    | .542 | .450        | .533 | .470 | --   | .987        | .983 | .976        |
| 6. LC     | .498 | <b>.311</b> | .405 | .376 | .483 | --          | .967 | .970        |
| 7. R/I    | .480 | .278        | .412 | .360 | .398 | .412        | --   | .881        |

|       |      |             |             |      |      |      |      |    |
|-------|------|-------------|-------------|------|------|------|------|----|
| 8. WM | .360 | <b>.312</b> | <b>.318</b> | .312 | .367 | .380 | .329 | -- |
|-------|------|-------------|-------------|------|------|------|------|----|

*Note.* Correlations are below the diagonal; heterogeneity statistics are above the diagonal. RC = reading comprehension; WRF = word reading fluency; TRF = text reading fluency; V/M = vocabulary and morphological knowledge; LC = listening comprehension; R/I = reasoning and inference. Bolded values indicate homogenous correlations.

**Table C4**

Correlations and heterogeneity statistics for the older cohort.

| Construct | 1    | 2           | 3    | 4    | 5    | 6           | 7           | 8    | 9           |
|-----------|------|-------------|------|------|------|-------------|-------------|------|-------------|
| 1. RC     | --   | .963        | .990 | .992 | .987 | .981        | .984        | .971 | .981        |
| 2. WRF    | .394 | --          | .992 | .988 | .920 | <b>.000</b> | <b>.000</b> | .939 | <b>.000</b> |
| 3. TRF    | .527 | .596        | --   | .991 | .983 | .865        | .963        | .976 | .972        |
| 4. DA     | .438 | .589        | .522 | --   | .981 | .955        | .981        | .982 | .964        |
| 5. V/M    | .562 | .382        | .514 | .485 | --   | .986        | .987        | .979 | .989        |
| 6. LC     | .494 | <b>.313</b> | .393 | .346 | .477 | --          | .862        | .981 | <b>.000</b> |
| 7. R/I    | .434 | <b>.243</b> | .362 | .304 | .401 | .358        | --          | .989 | .992        |
| 8. WM     | .324 | .272        | .363 | .336 | .316 | .292        | .352        | --   | .979        |
| 9. BGK    | .436 | <b>.302</b> | .288 | .356 | .526 | <b>.517</b> | .376        | .323 | --          |

*Note.* Correlations are below the diagonal; heterogeneity statistics are above the diagonal. RC = reading comprehension; WRF = word reading fluency; TRF = text reading fluency; V/M = vocabulary and morphological knowledge; LC = listening comprehension; R/I = reasoning and inference; BGK = background knowledge. Bolded values indicate homogenous correlations.

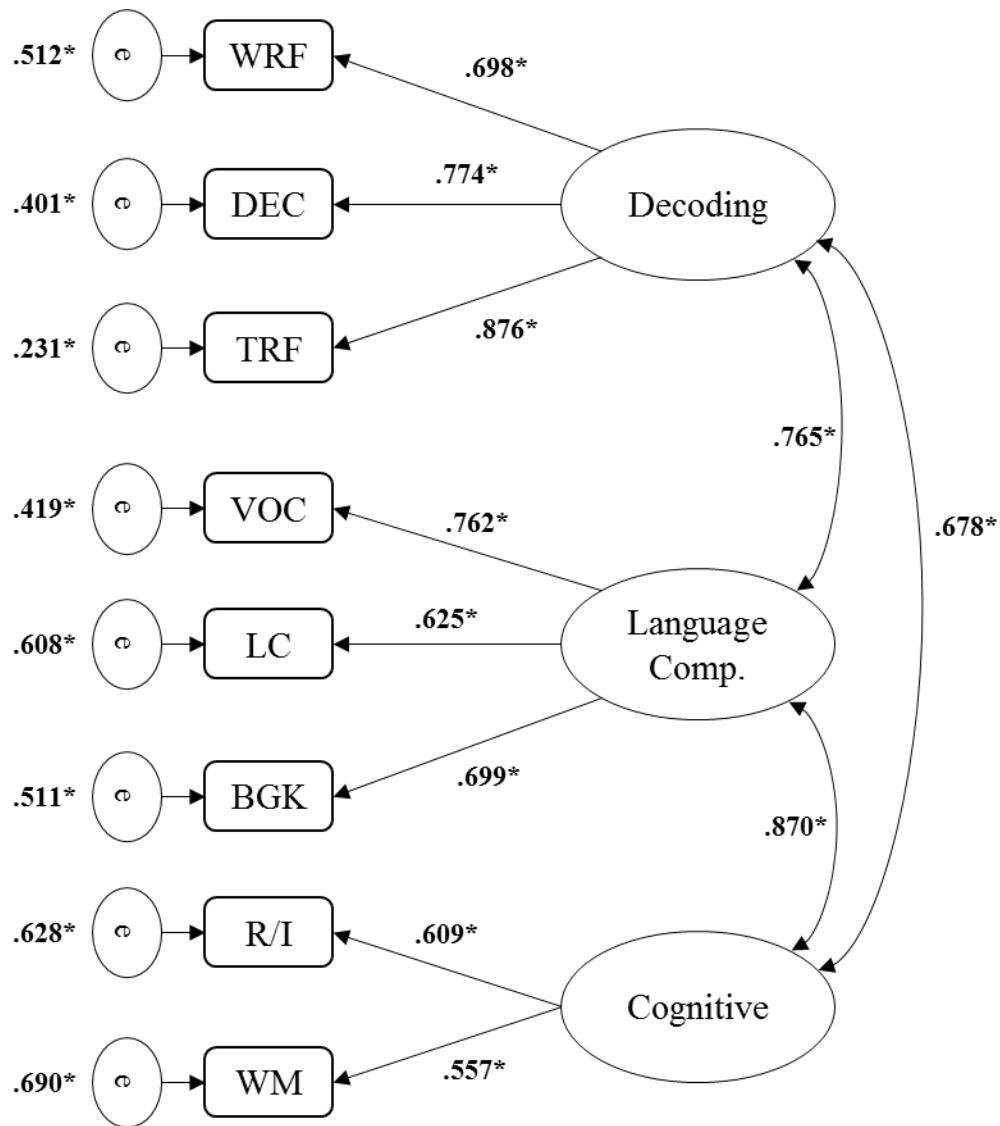

Figure C1. Three factor CFA model for the full sample. WRF = word reading fluency; DEC = decoding accuracy; TRF = text reading fluency; VOC = vocabulary knowledge; LC = listening comprehension; BGK = background knowledge; R/I = reasoning and inference; WM = working memory. e = residual error terms. \* =  $p < .01$ .
